# Supplementary material for: The Fragility Index in a Cohort of HIV/AIDS Randomized Controlled Trials
Source: Springer Nature journal article supplement (doi:10.1007/s11606-019-04928-5), 2019-04-29
Supplement: MOESM1 [file 16684762]

Supplemental table 1. Risk of bias for each included article (n = 36).

| **Study Title** | **Risk of bias arising from the randomization process** | **Risk of bias due to deviations from intended interventions** | **Risk of bias due to missing outcome data** | **Risk of bias in Measurement of the outcome** | **Risk of bias in Selection of the reported result** | **Overall risk of bias** |
| --- | --- | --- | --- | --- | --- | --- |
| A controlled trial of two nucleoside analogues plus indinavir in persons with human immunodeficiency virus infection and CD4 cell counts of 200 per cubic millimeter or less | Some Concern | Low Risk | Low Risk | Low Risk | Low Risk | Some Concern |
| A randomized comparison of second-line lopinavir/ritonavir monotherapy versus tenofovir/lamivudine/lopinavir/ritonavir in patients failing NNRTI regimens: the HIV STAR study | Low Risk | Low Risk | Low Risk | Low Risk | Low Risk | Low |
| A randomized study of antiretroviral management based on plasma genotypic antiretroviral resistance testing in patients failing therapy. CPCRA 046 Study Team for the Terry Beirn Community Programs for Clinical Research on AIDS | Low Risk | Low Risk | Low Risk | Low Risk | Low Risk | Low |
| Abacavir versus Zidovudine Combined with Lamivudine and Efavirenz, for the Treatment of Antiretroviral-Naive HIV-Infected Adults | Some Concern | Low Risk | Low Risk | Low Risk | Some Concerns | Some Concerns |
| Abacavir–Lamivudine versus Tenofovir– Emtricitabine for Initial HIV-1 Therapy | Some Concern | Low Risk | Low Risk | Low Risk | Low Risk | Some Concern |
| CD4+ Count–Guided Interruption of Antiretroviral Treatment | Some Concern | Low Risk | Low Risk | Low Risk | Low Risk | Some Concern |
| Co-formulated elvitegravir, cobicistat, emtricitabine, and tenofovir disoproxil fumarate versus ritonavir-boosted atazanavir plus co-formulated emtricitabine and tenofovir disoproxil fumarate for initial treatment of HIV-1 infection: a randomised, double-blind, phase 3, non-inferiority trial | Low Risk | Low Risk | Low Risk | Low Risk | Low Risk | Low |
| Co-formulated elvitegravir, cobicistat, emtricitabine, and tenofovir versus co-formulated efavirenz, emtricitabine, and tenofovir for initial treatment of HIV-1 infection: a randomised, double-blind, phase 3 trial, analysis of results after 48 weeks | Low Risk | Low Risk | Low Risk | Low Risk | Low Risk | Low |
| Dolutegravir plus Abacavir–Lamivudine for the Treatment of HIV-1 Infection | Some Concern | Low Risk | Low Risk | Low Risk | Low Risk | Some Concern |
| Dolutegravir versus raltegravir in antiretroviral-experienced, integrase-inhibitor-naive adults with HIV: week 48 results from the randomised, double-blind, non-inferiority SAILING study | Low Risk | Low Risk | Low Risk | Low Risk | Low Risk | Low |
| Dual treatment with atazanavir–ritonavir plus lamivudine versus triple treatment with atazanavir–ritonavir plus two nucleos(t)ides in virologically stable patients with HIV-1 (SALT): 48 week results from a randomised, open-label, non-inferiority trial | Low Risk | Low Risk | Low Risk | Low Risk | High Risk | High |
| Durable Efficacy and Safety of Raltegravir Versus Efavirenz When Combined With Tenofovir/Emtricitabine in Treatment-Naive HIV-1–Infected Patients: Final 5-Year Results From STARTMRK | Some Concern | Low Risk | Low Risk | Low Risk | Low Risk | Some Concern |
| Earlier versus later start of antiretroviral therapy in HIV-infected adults with tuberculosis | Some Concern | Low Risk | Low Risk | Low Risk | Some Concerns | Some Concern |
| Early Antiretroviral Therapy Reduces AIDS Progression/ Death in Individuals with Acute Opportunistic Infections: A Multicenter Randomized Strategy Trial | Low Risk | Low Risk | Low Risk | Low Risk | Low Risk | Low |
| Early versus Standard Antiretroviral Therapy for HIV-Infected Adults in Haiti | Low Risk | Low Risk | Low Risk | Low Risk | Some Concerns | Some Concern |
| Early virologic failure in HIV-1 infected subjects on didanosine/tenofovir/efavirenz: 12-week results from a randomized trial | Some Concern | Low Risk | Low Risk | Low Risk | Low Risk | Some Concern |
| Early Virologic Nonresponse to Tenofovir, Abacavir, and Lamivudine in HIV-Infected Antiretroviral-Naive Subjects | Low Risk | Low Risk | Low Risk | Low Risk | Some Concerns | Some Concern |
| Early virological failure with a combination of tenofovir, didanosine and efavirenz | Some Concern | Low Risk | Low Risk | Low Risk | Some Concerns | Some Concern |
| Efficacy and Safety of Emtricitabine vs Stavudine in Combination Therapy in Antiretroviral-Naive Patients A Randomized Trial | Low Risk | Low Risk | Low Risk | Low Risk | Some Concerns | Some Concern |
| Efficacy and safety of once daily elvitegravir versus twice daily raltegravir in treatment-experienced patients with HIV-1 receiving a ritonavir-boosted protease inhibitor: randomised, double-blind, phase 3, non-inferiority study | Low Risk | Low Risk | Low Risk | Low Risk | Low Risk | Low |
| Fixed duration interruptions are inferior to continuous treatment in African adults starting therapy with CD4 cell counts < 200 cells/microl | Low Risk | Low Risk | Low Risk | Low Risk | Low Risk | Low |
| HLA-B*5701 Screening for Hypersensitivity to Abacavir | Low Risk | Low Risk | Low Risk | Low Risk | Some Concerns | Some Concern |
| Initiation of Antiretroviral Therapy in Early Asymptomatic HIV Infection | Some Concern | Low Risk | Low Risk | Low Risk | Low Risk | Some Concern |
| Integration of Antiretroviral Therapy with Tuberculosis Treatment | Low Risk | Some Concern | Low Risk | Low Risk | Low Risk | Some Concern |
| Once-daily dolutegravir versus darunavir plus ritonavir in antiretroviral-naive adults with HIV-1 infection (FLAMINGO): 48 week results from the randomised open-label phase 3b study | Low Risk | Low Risk | Low Risk | Low Risk | Low Risk | Low |
| Prevention of HIV-1 infection with early antiretroviral therapy | Low Risk | Low Risk | Low Risk | Low Risk | Low Risk | Low |
| Randomized placebo-controlled trial of prednisone for paradoxical TB-associated immune reconstitution inflammatory syndrome | Low Risk | Low Risk | Low Risk | Low Risk | High Risk | High |
| SOLO: 48-week efficacy and safety comparison of once-daily fosamprenavir /ritonavir versus twice-daily nelfinavir in naive HIV-1-infected patients | Some Concern | Low Risk | Low Risk | Low Risk | Low Risk | Some Concern |
| Structured treatment interruption in patients with multidrug-resistant human immunodeficiency virus | Low Risk | Low Risk | Low Risk | Low Risk | Some Concerns | Some Concerns |
| Tenofovir disoproxil fumarate, emtricitabine, and efavirenz versus fixed-dose zidovudine/lamivudine and efavirenz in antiretroviral-naive patients: virologic, immunologic, and morphologic changes--a 96-week analysis | Some Concern | Low Risk | Low Risk | Low Risk | Low Risk | Some Concern |
| The RADAR study: week 48 safety and efficacy of RAltegravir combined with boosted DARunavir compared to tenofovir/emtricitabine combined with boosted darunavir in antiretroviral-naive patients. Impact on bone health | Low Risk | Low Risk | Low Risk | Low Risk | High Risk | High |
| Timing of antiretroviral therapy after diagnosis of cryptococcal meningitis | Low Risk | Low Risk | Low Risk | Low Risk | Low Risk | Low |
| Timing of Antiretroviral Therapy for HIV-1 Infection and Tuberculosis | Low Risk | Low Risk | Low Risk | Low Risk | Low Risk | Low |
| Timing of Initiation of Antiretroviral Therapy in Human Immunodeficiency Virus (HIV)– Associated Tuberculous Meningitis | Low Risk | Low Risk | Low Risk | Low Risk | Low Risk | Low |
| Usefulness of monitoring HIV drug resistance and adherence in individuals failing highly active antiretroviral therapy: a randomized study (ARGENTA) | Some Concern | Low Risk | Low Risk | Low Risk | Some Concerns | Some Concern |
| Week 48 results from a randomized clinical trial of rilpivirine/emtricitabine/tenofovir disoproxil fumarate vs. efavirenz/emtricitabine/tenofovir disoproxil fumarate in treatment-naive HIV-1-infected adults | Low Risk | Low Risk | Low Risk | Low Risk | Some Concerns | Some Concern |
